# Supplementary material for: Aspirin and Primary Cancer Risk Reduction in Ischemic Cardiac or Cerebrovascular Disease Survivors: A Nationwide Population-Based Propensity-Matched Cohort Study
Source: MDPI journal article supplement (doi:10.3390/cancers15010097), 2022-12-23
Supplement: s1 [file s1]

**Table S1.** Demographic and baseline clinical characteristics of patients in the two propensity-matched study cohorts who had aspirin use or matched index date within 90 days after ICCD

| Characteristics                             | Aspirin user<br>( <i>n</i> = 1141) |      | Aspirin nonuser<br>( <i>n</i> = 1141) |      | Standardized<br>mean<br>difference |
|---------------------------------------------|------------------------------------|------|---------------------------------------|------|------------------------------------|
|                                             | <i>n</i>                           | %    | <i>n</i>                              | %    |                                    |
| Sex                                         |                                    |      |                                       |      |                                    |
| Female                                      | 530                                | 46.5 | 527                                   | 46.2 | <0.001                             |
| Male                                        | 611                                | 53.6 | 614                                   | 53.8 | <0.001                             |
| Age (years)                                 |                                    |      |                                       |      |                                    |
| 20–39                                       | 17                                 | 1.49 | 50                                    | 4.38 | 0.210                              |
| 40–59                                       | 204                                | 17.9 | 241                                   | 21.1 | 0.060                              |
| 60–79                                       | 620                                | 54.3 | 489                                   | 42.9 | 0.260                              |
| ≥ 80                                        | 300                                | 26.3 | 361                                   | 31.6 | 0.160                              |
| Comorbidities                               |                                    |      |                                       |      |                                    |
| Hypertension                                | 825                                | 72.3 | 829                                   | 72.7 | 0.010                              |
| Diabetes mellitus                           | 405                                | 35.5 | 417                                   | 36.6 | 0.060                              |
| Hyperlipidemia                              | 332                                | 29.3 | 335                                   | 29.6 | 0.010                              |
| Atrial fibrillation                         | 102                                | 9.01 | 109                                   | 9.63 | 0.020                              |
| Alcohol-related illness                     | 34                                 | 2.98 | 47                                    | 4.12 | 0.020                              |
| Mild liver disease                          | 373                                | 32.7 | 348                                   | 30.5 | 0.040                              |
| Moderate or severe liver disease            | 31                                 | 2.72 | 29                                    | 2.54 | 0.010                              |
| Hepatitis B                                 | 42                                 | 3.68 | 40                                    | 3.51 | 0.040                              |
| Hepatitis C                                 | 26                                 | 2.28 | 30                                    | 2.63 | 0.050                              |
| Rheumatic disease                           | 81                                 | 7.10 | 73                                    | 6.40 | <0.001                             |
| Myocardial infarction                       | 141                                | 12.4 | 150                                   | 13.2 | 0.010                              |
| Congestive heart failure                    | 281                                | 24.6 | 284                                   | 24.9 | 0.040                              |
| Chronic pulmonary disease                   | 270                                | 23.7 | 258                                   | 22.6 | 0.002                              |
| Peptic ulcer disease                        | 558                                | 48.9 | 538                                   | 47.2 | 0.060                              |
| Gastrointestinal bleeding                   | 270                                | 23.7 | 258                                   | 22.6 | 0.020                              |
| Renal disease                               | 121                                | 10.6 | 131                                   | 11.5 | 0.010                              |
| Prior drug use                              |                                    |      |                                       |      |                                    |
| Anti-hypertensive agents                    | 912                                | 79.9 | 912                                   | 79.9 | 0.049                              |
| Drugs for cardiac therapy                   | 625                                | 54.8 | 641                                   | 56.2 | 0.010                              |
| Peripheral vasodilators and vasoprotectives | 376                                | 33.0 | 381                                   | 33.4 | 0.010                              |
| HMG-CoA reductase inhibitors                | 96                                 | 8.41 | 86                                    | 7.54 | 0.030                              |
| Other lipid-modifying agents                | 27                                 | 2.37 | 22                                    | 1.93 | 0.060                              |
| Hypoglycemia agents                         | 358                                | 31.6 | 378                                   | 33.4 | 0.040                              |

|                                       |     |      |     |      |       |
|---------------------------------------|-----|------|-----|------|-------|
| Coumadin and heparin                  | 187 | 16.5 | 186 | 16.4 | 0.002 |
| Other antithrombotic agents           | 355 | 31.4 | 339 | 30.0 | 0.030 |
| Proton pump inhibitors                | 297 | 26.2 | 271 | 23.9 | 0.050 |
| H2-receptor antagonists               | 416 | 36.8 | 395 | 34.9 | 0.040 |
| Antacids                              | 936 | 82.7 | 927 | 81.9 | 0.020 |
| Estrogens and progestogens            | 31  | 2.74 | 28  | 2.47 | 0.020 |
| Non-steroidal anti-inflammatory drugs | 784 | 69.3 | 809 | 71.5 | 0.050 |

HMG-CoA, 3-hydroxy-3-methyl-glutaryl-coenzyme A; H2-receptor, histamine type-2 receptor.

Prior drug use was defined as medications that were prescribed within 6 months prior to the index date.

Standardized mean difference  $\leq 0.2$  indicates a negligible difference between the two study cohorts.

**Table S2.** Incidence rate and risk of developing primary cancer in ICCD survivors who had aspirin use or matched index date within 90 days after ICCD, stratified by various types of cancer.

| Cancer<br>(ICD-9-CM)       | Aspirin user |      | Aspirin nonuser |      | Aspirin user vs. Aspirin nonuser |                          |
|----------------------------|--------------|------|-----------------|------|----------------------------------|--------------------------|
|                            | Event        | IR   | Event           | IR   | Crude HR<br>(95 % CI)            | Adjusted HR<br>(95 % CI) |
| All (140–208)              | 49           | 7.83 | 73              | 43.6 | 0.26 (0.18–0.37)***              | 0.23 (0.15–0.34)***      |
| Head and neck<br>(140–149) | 0            | 0.00 | 5               | 2.99 | -                                | -                        |
| Esophagus (150)            | 1            | 0.16 | 2               | 1.20 | -                                | -                        |
| Stomach (151)              | 4            | 0.64 | 7               | 4.18 | 0.23 (0.06–0.80)*                | 0.17 (0.04–0.74)*        |
| Colon (153-154)            | 12           | 1.92 | 21              | 12.6 | 0.21 (0.10–0.43)***              | 0.20 (0.09–0.43)***      |
| Hepatoma (155)             | 7            | 1.12 | 11              | 6.57 | 0.20 (0.08–0.54)**               | 0.28 (0.09–0.83)*        |
| Pancreas (157)             | 1            | 0.16 | 1               | 0.60 | 0.34 (0.02–5.70)                 | -                        |
| Lung (162)                 | 12           | 1.92 | 13              | 7.77 | 0.39 (0.17–0.87)*                | 0.33 (0.14–0.78)*        |
| Breast (174, 175)          | 2            | 0.32 | 2               | 1.20 | 0.34 (0.05–2.45)                 | -                        |
| Ovary (183)                | 0            | 0.00 | 0               | 0.00 | -                                | -                        |
| Prostate (185)             | 10           | 1.60 | 11              | 6.57 | 0.35 (0.14–0.83)*                | 0.22 (0.08–0.61)**       |

ICCD, ischemic cardiac or cerebrovascular disease; IR, incidence rates (per 1,000 person-years); HR, hazard ratio; CI, confidence interval.

In the Cox proportional hazard model, adjusted HR was obtained after adjustment for age, sex, baseline comorbidities, and prior drug use.

\* $p < 0.05$ , \*\* $p < 0.01$ , \*\*\* $p < 0.001$ .
